# Supplementary material
Source: Springer Nature journal article supplement (https://www.springermedizin.de/resource/supplementary/13048_2013_146_MOESM5_ESM.pdf/9665000)

**A**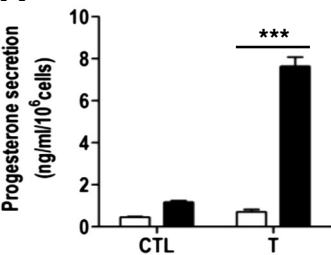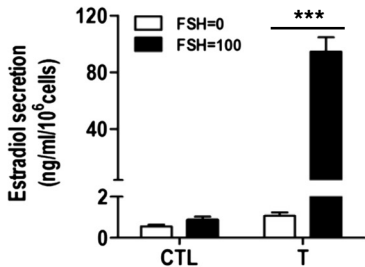**B**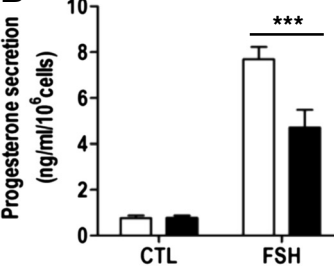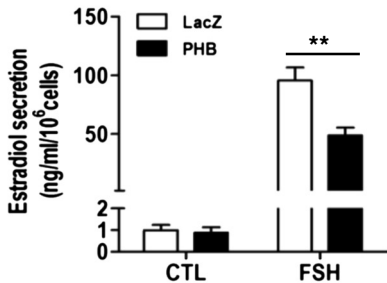**C**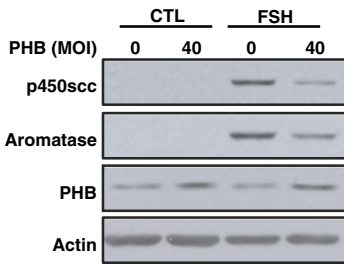

Supplement: MOESM5 [file 9665000]
